# Supplementary material for: Structure of the Golgi apparatus is not influenced by a GAG deletion mutation in the dystonia-associated gene Tor1a
Source: PubMed Central journal article supplement (PMC6221310; doi:10.1371/journal.pone.0206123), 2018-11-07
Supplement: pone.0206123.s002.pdf [file pone.0206123.s002.pdf]

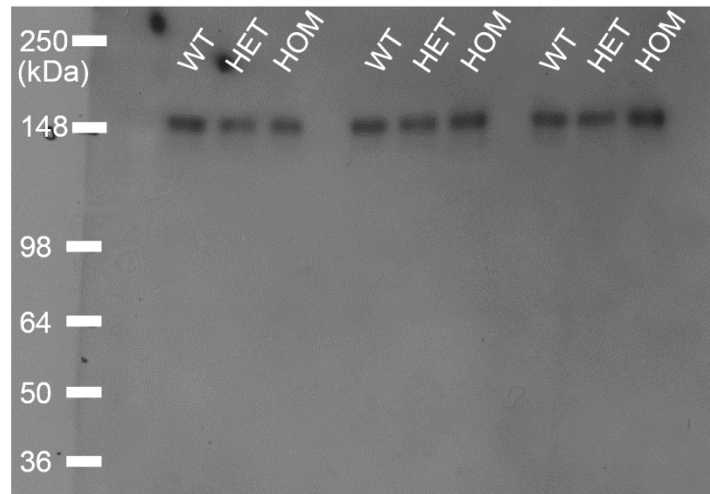

**S2 Fig. Western blotting of GM130.** This whole-membrane image corresponds to the data presented in Fig 14.
